# Supplementary material for: Genetic regulatory mechanisms in human osteoclasts suggest a role for the STMP1 and DCSTAMP genes in Paget’s disease of bone
Source: PubMed Central journal article supplement (PMC6355970; doi:10.1038/s41598-018-37609-0), 2019-01-31
Supplement: 41598_2018_37609_MOESM1_ESM.pdf [file 41598_2018_37609_MOESM1_ESM.pdf]

**Genetic regulatory mechanisms in human osteoclasts suggest a role for the *STMP1* and *DCSTAMP* genes in Paget's disease of bone**

Benjamin H Mullin<sup>1,2\*</sup>, Kun Zhu<sup>1,3</sup>, Suzanne J Brown<sup>1</sup>, Shelby Mullin<sup>1,2</sup>, Jennifer Tickner<sup>2</sup>, Nathan J Pavlos<sup>2</sup>, Frank Dudbridge<sup>4</sup>, Jiake Xu<sup>2</sup>, John P Walsh<sup>1,3</sup>, Scott G Wilson<sup>1,2,5</sup>

<sup>1</sup>Department of Endocrinology & Diabetes, Sir Charles Gairdner Hospital, Nedlands, WA, Australia

<sup>2</sup>School of Biomedical Sciences, University of Western Australia, Crawley, WA, Australia

<sup>3</sup>Medical School, University of Western Australia, Crawley, WA, Australia

<sup>4</sup>Department of Health Sciences, University of Leicester, Leicester, UK

<sup>5</sup>Department of Twin Research & Genetic Epidemiology, King's College London, London, UK

**Supplementary Information**

**Supplementary Table S1. Demographics of the study cohort**

| <b>Demographic variable</b>           | <b>Mean <math>\pm</math> SD</b> |
|---------------------------------------|---------------------------------|
| Subjects (n)                          | 158                             |
| Age (years)                           | 57.2 $\pm$ 9.7                  |
| Age (range)                           | 30.5 – 69.8                     |
| Height (cm)                           | 162.7 $\pm$ 6.2                 |
| Weight (kg)                           | 67.7 $\pm$ 13.0                 |
| BMI (kg/m <sup>2</sup> )              | 25.6 $\pm$ 5.1                  |
| Spine BMD (g/cm <sup>2</sup> )        | 0.94 $\pm$ 0.15                 |
| Spine BMD T-score                     | -0.96 $\pm$ 1.34                |
| Total hip BMD (g/cm <sup>2</sup> )    | 0.84 $\pm$ 0.12                 |
| Total hip BMD T-score                 | -0.80 $\pm$ 0.99                |
| Femoral neck BMD (g/cm <sup>2</sup> ) | 0.72 $\pm$ 0.11                 |
| Femoral neck BMD T-score              | -1.17 $\pm$ 0.96                |

SD: standard deviation; BMD: bone mineral density.

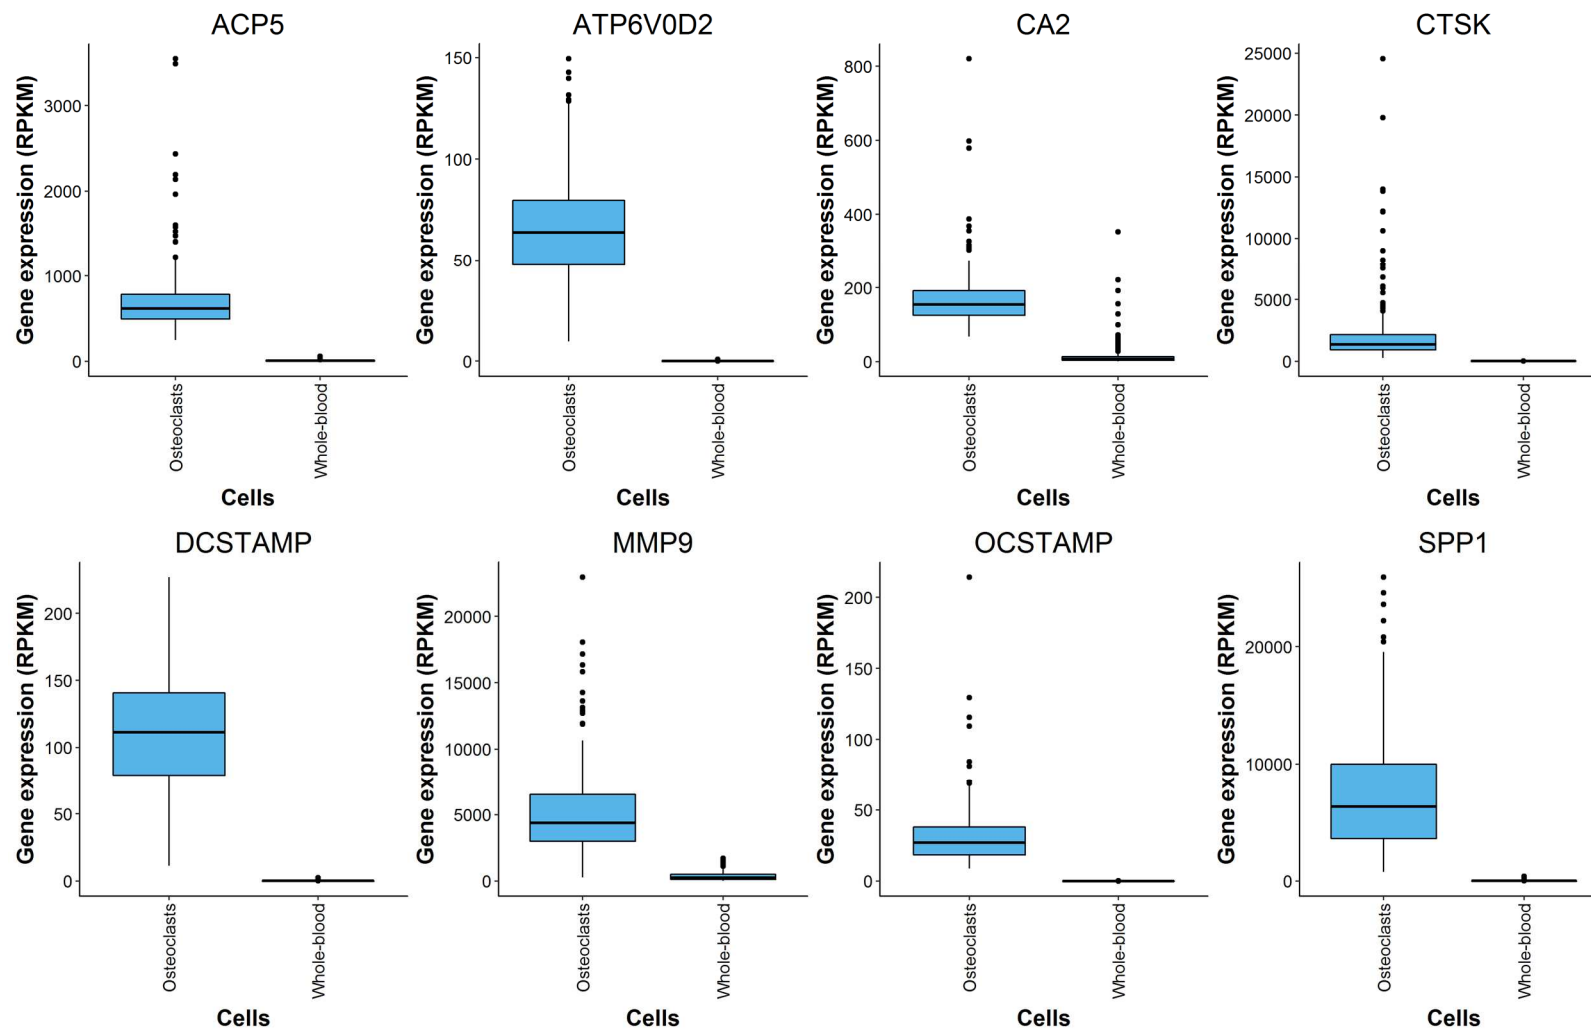

**Supplementary Fig. S1.** Box-and-whisker plots displaying expression levels of several osteoclast marker genes in the osteoclast-like cells relative to the GTEx whole-blood sample set (n=393).
